# Supplementary material for: Discovery of thirteen cobalt(ii) and copper(ii) salicylaldehyde Schiff base complexes that induce apoptosis and autophagy in human lung adenocarcinoma A549/DDP cells and that can overcome cisplatin resistance in vitro and in vivo
Source: Royal Society of Chemistry journal article supplement (doi:10.1039/d1dt03749h), 2022-01-01
Supplement: d1dt03749h1.pdf [file d1dt03749h1.pdf]

**Discovery of thirteen cobalt(II) and copper(II) salicylaldehyde Schiff-bases complexes that induces apoptosis and autophagy in human lung adenocarcinoma A549/DDP cells, overcoming cisplatin-resistant *in vitro* and *in vivo***

Ya-Ting Chen <sup>a,c</sup>, Shao-Nan Zhang <sup>c</sup>, Zhen-Feng Wang <sup>a,c</sup>, Qing-Min Wei <sup>b,\*</sup>, Shu-Hua Zhang <sup>a,c,\*</sup>

<sup>a</sup> College of Chemistry, Guangdong University of Petrochemical Technology, Maoming, Guangdong, 525000, P R China. E-mail: zsh720108@163.com.

<sup>b</sup> College of Chemistry and Food Science, Yulin Normal University, 1303 Jiaoyudong Road, Yulin 537000, PR China. Weiqingmin09@163.com.

<sup>c</sup> Guangxi Key Laboratory of Electrochemical and Magnetochemical Functional Materials, College of Chemistry and Bioengineering, Guilin University of Technology, Guilin, 541004, P R China.

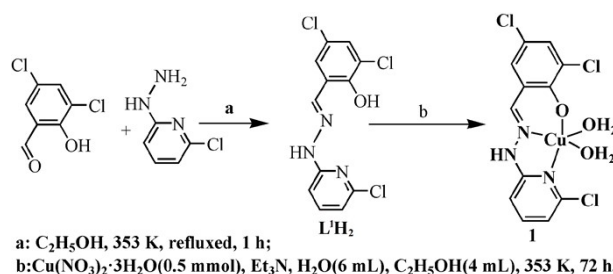

**Scheme S1.** Synthesis routes for **1**.

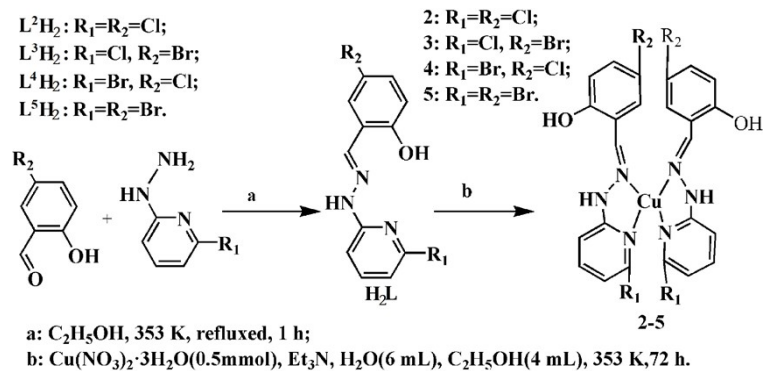

**Scheme S2.** Synthesis routes for 2–5.

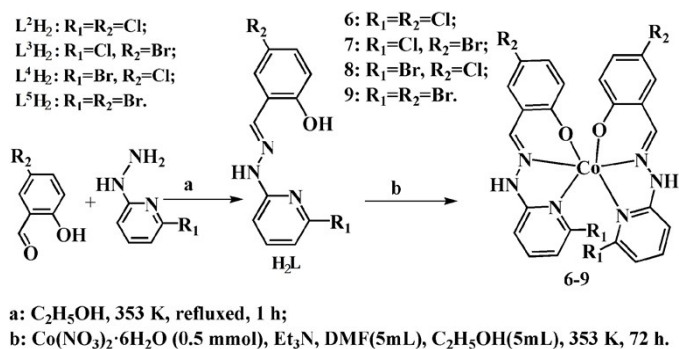

**Scheme S3.** Synthesis routes for 6–9.

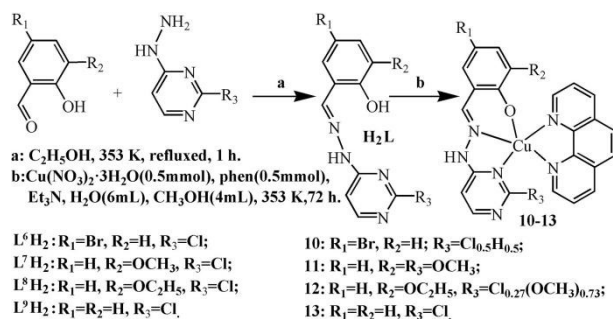

**Scheme S4.** Synthesis routes for 10–13.

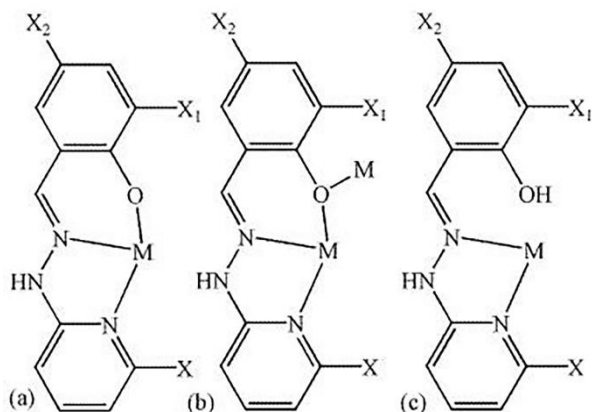

**Scheme S5.** Coordination modes of the Schiff base ligands.

**Table S1.** Crystallographic data for **1-9**.

| Complexes                                                                | 1                                                                               | 2                                                                               | 3                                                                                               | 4                                                                                               | 5                                                                               | 6                                                                                                | 7                                                                                                                | 8                                                                                                              | 9                                                                                               |
|--------------------------------------------------------------------------|---------------------------------------------------------------------------------|---------------------------------------------------------------------------------|-------------------------------------------------------------------------------------------------|-------------------------------------------------------------------------------------------------|---------------------------------------------------------------------------------|--------------------------------------------------------------------------------------------------|------------------------------------------------------------------------------------------------------------------|----------------------------------------------------------------------------------------------------------------|-------------------------------------------------------------------------------------------------|
| Chemical Formula                                                         | C <sub>12</sub> H <sub>13</sub> Cl <sub>3</sub> CuN <sub>4</sub> O <sub>7</sub> | C <sub>24</sub> H <sub>22</sub> Cl <sub>4</sub> CuN <sub>7</sub> O <sub>7</sub> | C <sub>24</sub> H <sub>22</sub> Br <sub>2</sub> Cl <sub>2</sub> CuN <sub>7</sub> O <sub>7</sub> | C <sub>24</sub> H <sub>22</sub> Br <sub>2</sub> Cl <sub>2</sub> CuN <sub>7</sub> O <sub>7</sub> | C <sub>24</sub> H <sub>22</sub> Br <sub>4</sub> CuN <sub>7</sub> O <sub>7</sub> | C <sub>48</sub> H <sub>33</sub> Cl <sub>8</sub> Co <sub>2</sub> N <sub>12</sub> O <sub>4.5</sub> | C <sub>48</sub> H <sub>33</sub> Br <sub>4</sub> Cl <sub>4</sub> Co <sub>2</sub> N <sub>12</sub> O <sub>4.5</sub> | C <sub>97</sub> H <sub>68</sub> Br <sub>8</sub> Cl <sub>8</sub> Co <sub>4</sub> N <sub>24</sub> O <sub>9</sub> | C <sub>97</sub> H <sub>68</sub> Br <sub>16</sub> Co <sub>4</sub> N <sub>24</sub> O <sub>9</sub> |
| MW (g·mol <sup>-1</sup> )                                                | 495.16                                                                          | 725.84                                                                          | 814.74                                                                                          | 814.74                                                                                          | 903.64                                                                          | 1251.32                                                                                          | 1429.12                                                                                                          | 2872.27                                                                                                        | 3227.87                                                                                         |
| Crystal system                                                           | monoclinic                                                                      | monoclinic                                                                      | monoclinic                                                                                      | monoclinic                                                                                      | monoclinic                                                                      | triclinic                                                                                        | triclinic                                                                                                        | triclinic                                                                                                      | triclinic                                                                                       |
| Space group                                                              | <i>C2/c</i>                                                                     | <i>I2</i>                                                                       | <i>I2</i>                                                                                       | <i>C2</i>                                                                                       | <i>C2</i>                                                                       | <i>P</i> $\bar{1}$                                                                               | <i>P</i> $\bar{1}$                                                                                               | <i>P</i> $\bar{1}$                                                                                             | <i>P</i> $\bar{1}$                                                                              |
| <i>a</i> (Å)                                                             | 20.398(2)                                                                       | 21.242(1)                                                                       | 22.667(1)                                                                                       | 23.057(3)                                                                                       | 23.291(2)                                                                       | 10.090(1)                                                                                        | 10.067(1)                                                                                                        | 10.247(1)                                                                                                      | 10.305(1)                                                                                       |
| <i>b</i> (Å)                                                             | 14.198(1)                                                                       | 7.120(1)                                                                        | 7.210(1)                                                                                        | 7.219(1)                                                                                        | 7.289(1)                                                                        | 12.348(1)                                                                                        | 12.285(1)                                                                                                        | 13.434(1)                                                                                                      | 13.617(1)                                                                                       |
| <i>c</i> (Å)                                                             | 13.639(1)                                                                       | 22.406(1)                                                                       | 21.144(1)                                                                                       | 22.309(2)                                                                                       | 22.583(2)                                                                       | 13.279(1)                                                                                        | 13.517(1)                                                                                                        | 20.930(1)                                                                                                      | 21.171(1)                                                                                       |
| $\alpha$ (°)                                                             | 90.00                                                                           | 90.00                                                                           | 90.00                                                                                           | 90.00                                                                                           | 90.00                                                                           | 63.24(1)                                                                                         | 63.38(1)                                                                                                         | 88.404(4)                                                                                                      | 89.131(4)                                                                                       |
| $\beta$ (°)                                                              | 113.84(1)                                                                       | 115.88(1)                                                                       | 115.48(1)                                                                                       | 123.60(2)                                                                                       | 124.60(1)                                                                       | 71.90(1)                                                                                         | 71.62(1)                                                                                                         | 80.376(4)                                                                                                      | 80.042(4)                                                                                       |
| $\gamma$ (°)                                                             | 90.00                                                                           | 90.00                                                                           | 90.00                                                                                           | 90.00                                                                                           | 90.00                                                                           | 78.89(1)                                                                                         | 79.00(1)                                                                                                         | 79.353(4)                                                                                                      | 78.773(5)                                                                                       |
| <i>V</i> (Å <sup>3</sup> )                                               | 3612.8(4)                                                                       | 3049.1(3)                                                                       | 3119.3(3)                                                                                       | 3092.9(8)                                                                                       | 3155.9(5)                                                                       | 1401.4(2)                                                                                        | 1415.7(2)                                                                                                        | 2791.8(2)                                                                                                      | 2869.5(3)                                                                                       |
| <i>F</i> (000)                                                           | 1992                                                                            | 1472                                                                            | 1616                                                                                            | 1616                                                                                            | 1760                                                                            | 631                                                                                              | 703                                                                                                              | 1414                                                                                                           | 1558                                                                                            |
| <i>Z</i>                                                                 | 8                                                                               | 4                                                                               | 4                                                                                               | 4                                                                                               | 4                                                                               | 1                                                                                                | 1                                                                                                                | 1                                                                                                              | 1                                                                                               |
| <i>D</i> <sub>c</sub> (g cm <sup>-3</sup> )                              | 1.821                                                                           | 1.581                                                                           | 1.735                                                                                           | 1.750                                                                                           | 1.902                                                                           | 1.483                                                                                            | 1.676                                                                                                            | 1.708                                                                                                          | 1.868                                                                                           |
| $\mu$ (mm <sup>-1</sup> )                                                | 1.698                                                                           | 1.121                                                                           | 3.487                                                                                           | 3.516                                                                                           | 5.809                                                                           | 1.027                                                                                            | 3.650                                                                                                            | 3.703                                                                                                          | 6.202                                                                                           |
| $\theta$ range (°)                                                       | 3.34-25.01                                                                      | 3.40-26.50                                                                      | 3.36-25.10                                                                                      | 3.36-25.10                                                                                      | 3.29-25.01                                                                      | 3.37-25.10                                                                                       | 3.49-25.10                                                                                                       | 3.34-25.10                                                                                                     | 3.33-25.01                                                                                      |
| Ref. meas. / indep.                                                      | 12202, 3178                                                                     | 10307, 5920                                                                     | 10066, 5079                                                                                     | 9684, 4880                                                                                      | 10157, 4447                                                                     | 8796, 4975                                                                                       | 9727, 4941                                                                                                       | 18233, 9651                                                                                                    | 18226, 10024                                                                                    |
| Obs. ref. [ <i>I</i> > 2 $\sigma$ ( <i>I</i> )]                          | 2683                                                                            | 3929                                                                            | 3710                                                                                            | 3065                                                                                            | 3499                                                                            | 4294                                                                                             | 3815                                                                                                             | 7293                                                                                                           | 6983                                                                                            |
| <i>R</i> <sub>int</sub>                                                  | 0.0329                                                                          | 0.0334                                                                          | 0.0325                                                                                          | 0.0473                                                                                          | 0.0294                                                                          | 0.0136                                                                                           | 0.0269                                                                                                           | 0.0251                                                                                                         | 0.0298                                                                                          |
| <i>R</i> <sub>1</sub> [ <i>I</i> ≥ 2 $\sigma$ ( <i>I</i> )] <sup>a</sup> | 0.0361                                                                          | 0.0586                                                                          | 0.0439                                                                                          | 0.0661                                                                                          | 0.0544                                                                          | 0.0521                                                                                           | 0.0544                                                                                                           | 0.0426                                                                                                         | 0.0482                                                                                          |
| $\omega R_2$ (all data) <sup>b</sup>                                     | 0.1188                                                                          | 0.1462                                                                          | 0.1021                                                                                          | 0.2065                                                                                          | 0.1592                                                                          | 0.1418                                                                                           | 0.1380                                                                                                           | 0.1179                                                                                                         | 0.1197                                                                                          |
| Goof                                                                     | 1.007                                                                           | 1.056                                                                           | 1.007                                                                                           | 1.003                                                                                           | 1.007                                                                           | 1.001                                                                                            | 0.991                                                                                                            | 1.001                                                                                                          | 1.005                                                                                           |

|                                                          |               |               |               |               |               |               |               |               |               |
|----------------------------------------------------------|---------------|---------------|---------------|---------------|---------------|---------------|---------------|---------------|---------------|
| $\Delta\rho(\text{max, min})(\text{e } \text{\AA}^{-3})$ | 0.403, -0.422 | 0.665, -0.597 | 0.529, -0.545 | 0.902, -0.826 | 0.935, -0.576 | 1.462, -0.803 | 1.936, -1.464 | 0.902, -0.503 | 1.485, -0.682 |
|----------------------------------------------------------|---------------|---------------|---------------|---------------|---------------|---------------|---------------|---------------|---------------|

---

**Table S2.** Crystallographic data for **10-13**.

| Complexes                                                                | <b>10</b>                                                                                                      | <b>11</b>                                                                        | <b>12</b>                                                                                                    | <b>13</b>                                                                                       |
|--------------------------------------------------------------------------|----------------------------------------------------------------------------------------------------------------|----------------------------------------------------------------------------------|--------------------------------------------------------------------------------------------------------------|-------------------------------------------------------------------------------------------------|
| Chemical Formula                                                         | C <sub>93</sub> H <sub>62</sub> Br <sub>4</sub> Cl <sub>2</sub> Cu <sub>4</sub> N <sub>24</sub> O <sub>5</sub> | C <sub>100</sub> H <sub>98</sub> Cu <sub>4</sub> N <sub>24</sub> O <sub>21</sub> | C <sub>103.94</sub> H <sub>99.82</sub> Cl <sub>1.06</sub> Cu <sub>4</sub> N <sub>24</sub> O <sub>17.44</sub> | C <sub>70</sub> H <sub>63</sub> Cl <sub>3</sub> Cu <sub>3</sub> N <sub>18</sub> O <sub>11</sub> |
| <i>M<sub>w</sub></i> (g·mol <sup>-1</sup> )                              | 2240.37                                                                                                        | 2226.22                                                                          | 2256.00                                                                                                      | 1629.38                                                                                         |
| Crystal system                                                           | triclinic                                                                                                      | monoclinic                                                                       | triclinic                                                                                                    | monoclinic                                                                                      |
| Space group                                                              | <i>P</i> $\bar{1}$                                                                                             | <i>P</i> 2 <sub>1</sub>                                                          | <i>P</i> $\bar{1}$                                                                                           | <i>P</i> 2 <sub>1</sub> / <i>c</i>                                                              |
| <i>a</i> (Å)                                                             | 12.923(1)                                                                                                      | 16.369(1)                                                                        | 10.256(1)                                                                                                    | 20.591(1)                                                                                       |
| <i>b</i> (Å)                                                             | 13.303(1)                                                                                                      | 19.839(1)                                                                        | 15.040(1)                                                                                                    | 12.324(1)                                                                                       |
| <i>c</i> (Å)                                                             | 14.076(1)                                                                                                      | 17.318(1)                                                                        | 17.018(1)                                                                                                    | 28.485(1)                                                                                       |
| $\alpha$ (°)                                                             | 85.644(4)                                                                                                      | 90.00                                                                            | 88.110(4)                                                                                                    | 90.00                                                                                           |
| $\beta$ (°)                                                              | 71.862(7)                                                                                                      | 117.660(4)                                                                       | 87.004(4)                                                                                                    | 106.204(2)                                                                                      |
| $\gamma$ (°)                                                             | 72.048(6)                                                                                                      | 90.00                                                                            | 83.153(4)                                                                                                    | 90.00                                                                                           |
| <i>V</i> (Å <sup>3</sup> )                                               | 2187.2(3)                                                                                                      | 4981.2(3)                                                                        | 2601.7(2)                                                                                                    | 6941.1(3)                                                                                       |
| <i>F</i> (000)                                                           | 1118                                                                                                           | 2300                                                                             | 1165                                                                                                         | 3340                                                                                            |
| <i>Z</i>                                                                 | 1                                                                                                              | 2                                                                                | 1                                                                                                            | 4                                                                                               |
| <i>D<sub>c</sub></i> (g cm <sup>-3</sup> )                               | 1.701                                                                                                          | 1.484                                                                            | 1.440                                                                                                        | 1.559                                                                                           |
| $\mu$ (mm <sup>-1</sup> )                                                | 2.918                                                                                                          | 0.927                                                                            | 0.912                                                                                                        | 6.011                                                                                           |
| $\theta$ range (°)                                                       | 3.37-25.01                                                                                                     | 3.36-25.00                                                                       | 3.41-25.00                                                                                                   | 2.936-60.65                                                                                     |
| Ref. meas. / indep.                                                      | 15472, 7677                                                                                                    | 33470, 16474                                                                     | 17108, 9123                                                                                                  | 55337, 15483                                                                                    |
| Obs. ref. [ <i>I</i> > 2 $\sigma$ ( <i>I</i> )]                          | 4205                                                                                                           | 12519                                                                            | 5485                                                                                                         | 11304                                                                                           |
| <i>R</i> <sub>int</sub>                                                  | 0.0557                                                                                                         | 0.0329                                                                           | 0.0372                                                                                                       | 0.0413                                                                                          |
| <i>R</i> <sub>1</sub> [ <i>I</i> ≥ 2 $\sigma$ ( <i>I</i> )] <sup>a</sup> | 0.0633                                                                                                         | 0.0431                                                                           | 0.0689                                                                                                       | 0.0504                                                                                          |
| $\omega R_2$ (all data) <sup>b</sup>                                     | 0.1783                                                                                                         | 0.1122                                                                           | 0.1867                                                                                                       | 0.1319                                                                                          |
| Goof                                                                     | 1.018                                                                                                          | 1.005                                                                            | 1.006                                                                                                        | 1.017                                                                                           |
| $\Delta\rho$ (max,min)(eÅ <sup>-3</sup> )                                | 1.050, -0.744                                                                                                  | 0.354, -0.339                                                                    | 0.772, -0.557                                                                                                | 1.085, -0.761                                                                                   |

**Table S3.** Selected bond lengths (Å) and bond angles (°) for **1-13**.

|          |           |            |           |            |
|----------|-----------|------------|-----------|------------|
| <b>1</b> | Cu1–O1    | 1.914(2)   | O1–Cu1–O3 | 87.34(11)  |
|          | Cu1–N1    | 1.950(2)   | N1–Cu1–N3 | 80.90(10)  |
|          | Cu1–N3    | 2.038(3)   | N1–Cu1–O2 | 119.26(10) |
|          | Cu1–O2    | 2.183(2)   | N1–Cu1–O3 | 141.12(10) |
|          | Cu1–O3    | 2.017(2)   | N3–Cu1–O3 | 100.13(10) |
|          | O1–Cu1–N1 | 91.36(9)   | O2–Cu1–N3 | 93.50(10)  |
|          | O1–Cu1–N3 | 171.92(10) | O2–Cu1–O3 | 99.55(10)  |
|          | O1–Cu1–O2 | 88.26(10)  |           |            |
| <b>2</b> | Cu1–N3    | 2.075(7)   | N4–Cu1–N6 | 80.9(3)    |
|          | Cu1–N4    | 2.020(6)   | N1–Cu1–N3 | 81.0(3)    |
|          | Cu1–N1    | 2.015(7)   | N1–Cu1–N4 | 126.4(3)   |
|          | Cu1–N6    | 2.071(7)   | N1–Cu1–N6 | 130.2(3)   |
|          | N4–Cu1–N3 | 136.4(3)   | N6–Cu1–N3 | 108.0(3)   |
| <b>3</b> | Cu1–N6    | 2.034(6)   | N6–Cu1–N4 | 81.3(3)    |
|          | Cu1–N3    | 2.081(6)   | N1–Cu1–N6 | 126.1(3)   |

|   |           |            |           |            |
|---|-----------|------------|-----------|------------|
|   | Cu1-N1    | 2.009(7)   | N1-Cu1-N3 | 80.5(3)    |
|   | Cu1-N4    | 2.071(7)   | N1-Cu1-N4 | 130.6(3)   |
|   | N6-Cu1-N3 | 136.1(3)   | N4-Cu1-N3 | 108.4(2)   |
|   | Cu1-N3    | 2.088(12)  | N6-Cu1-N4 | 81.2(5)    |
|   | Cu1-N6    | 2.023(10)  | N6-Cu1-N1 | 125.6(5)   |
| 4 | Cu1-N4    | 2.084(13)  | N4-Cu1-N3 | 107.5(4)   |
|   | Cu1-N1    | 2.037(13)  | N1-Cu1-N3 | 80.7(5)    |
|   | N6-Cu1-N3 | 137.9(5)   | N1-Cu1-N4 | 130.3(5)   |
|   | Cu1-N3    | 2.034(10)  | N6-Cu1-N4 | 80.9(4)    |
|   | Cu1-N6    | 2.084(10)  | N6-Cu1-N1 | 108.4(4)   |
| 5 | Cu1-N4    | 2.032(11)  | N4-Cu1-N3 | 126.0(4)   |
|   | Cu1-N1    | 2.078(10)  | N1-Cu1-N3 | 81.1(4)    |
|   | N6-Cu1-N3 | 136.3(5)   | N1-Cu1-N4 | 130.4(4)   |
|   | Co1-O2    | 2.046(3)   | N3-Co1-N6 | 106.64(14) |
|   | Co1-N4    | 2.070(3)   | N3-Co1-N1 | 76.01(14)  |
|   | Co1-N3    | 2.075(3)   | O1-Co1-N4 | 88.63(13)  |
|   | Co1-O1    | 2.054(3)   | O1-Co1-N3 | 86.66(13)  |
|   | Co1-N6    | 2.237(4)   | O1-Co1-N6 | 90.04(14)  |
| 6 | Co1-N1    | 2.209(4)   | O1-Co1-N1 | 160.29(13) |
|   | O2-Co1-N4 | 86.81(13)  | N1-Co1-N6 | 86.08(13)  |
|   | O2-Co1-N3 | 91.52(13)  | N4-Co1-N3 | 174.61(15) |
|   | O2-Co1-O1 | 101.11(14) | N4-Co1-N6 | 75.96(13)  |
|   | O2-Co1-N6 | 159.29(13) | N4-Co1-N1 | 109.05(14) |
|   | O2-Co1-N1 | 88.84(13)  |           |            |
|   | Co1-O2    | 2.031(3)   | N6-Co1-N3 | 108.47(16) |
|   | Co1-N6    | 2.062(4)   | N6-Co1-N4 | 76.14(15)  |
|   | Co1-O1    | 2.045(4)   | O1-Co1-N6 | 89.20(15)  |
|   | Co1-N1    | 2.063(4)   | O1-Co1-N1 | 86.68(15)  |
|   | Co1-N3    | 2.203(4)   | O1-Co1-N3 | 160.40(15) |
| 7 | Co1-N4    | 2.222(4)   | O1-Co1-N4 | 90.21(16)  |
|   | O2-Co1-N6 | 86.71(14)  | N1-Co1-N6 | 175.01(18) |
|   | O2-Co1-O1 | 100.81(16) | N1-Co1-N3 | 76.03(16)  |
|   | O2-Co1-N1 | 91.29(15)  | N1-Co1-N4 | 106.66(16) |
|   | O2-Co1-N3 | 88.92(15)  | N3-Co1-N4 | 86.04(16)  |
|   | O2-Co1-N4 | 159.52(15) |           |            |
|   | Co1-O1    | 2.036(3)   | N4-Co1-N6 | 75.93(13)  |
|   | Co1-O2    | 2.049(3)   | N4-Co1-N3 | 109.14(12) |
| 8 | Co1-N4    | 2.081(3)   | N1-Co1-N4 | 172.54(13) |
|   | Co1-N1    | 2.066(3)   | N1-Co1-N6 | 110.20(13) |
|   | Co1-N6    | 2.228(3)   | N1-Co1-N3 | 76.14(12)  |
|   | Co1-N3    | 2.256(3)   | N6-Co1-N3 | 85.44(12)  |

|           |           |            |             |            |
|-----------|-----------|------------|-------------|------------|
|           | Co2-O4    | 2.044(3)   | O4-Co2-N9   | 91.35(11)  |
|           | Co2-N9    | 2.070(3)   | O4-Co2-N10  | 86.88(11)  |
|           | Co2-N10   | 2.070(3)   | O4-Co2-O3   | 103.30(12) |
|           | Co2-O3    | 2.052(3)   | O4-Co2-N7   | 87.21(12)  |
|           | Co2-N7    | 2.220(3)   | O4-Co2-N12  | 157.65(12) |
|           | Co2-N12   | 2.267(3)   | N9-Co2-N10  | 173.39(13) |
|           | O1-Co1-O2 | 102.83(12) | N9-Co2-N7   | 76.27(13)  |
|           | O1-Co1-N4 | 89.26(11)  | N9-Co2-N12  | 107.30(12) |
|           | O1-Co1-N1 | 86.53(11)  | N10-Co2-N7  | 109.97(13) |
|           | O1-Co1-N6 | 89.97(11)  | N10-Co2-N12 | 75.90(12)  |
|           | O1-Co1-N3 | 159.22(12) | O3-Co2-N9   | 86.11(12)  |
|           | O2-Co1-N4 | 86.17(12)  | O3-Co2-N10  | 88.11(12)  |
|           | O2-Co1-N1 | 88.83(12)  | O3-Co2-N7   | 159.76(12) |
|           | O2-Co1-N6 | 157.81(12) | O3-Co2-N12  | 90.45(12)  |
|           | O2-Co1-N3 | 88.15(12)  | N7-Co2-N12  | 85.46(12)  |
|           | Co1-O2    | 2.038(4)   | N4-Co1-N6   | 76.28(17)  |
|           | Co1-N6    | 2.069(4)   | N4-Co1-N3   | 109.64(16) |
|           | Co1-N3    | 2.072(4)   | N1-Co1-N4   | 85.29(16)  |
|           | Co1-N4    | 2.224(4)   | N1-Co1-N6   | 107.63(17) |
|           | Co1-O1    | 2.053(4)   | N1-Co1-N3   | 76.17(16)  |
|           | Co1-N1    | 2.263(5)   | N6-Co1-N3   | 173.44(17) |
|           | Co2-O3    | 2.038(4)   | O4-Co2-N9   | 86.11(16)  |
|           | Co2-N7    | 2.231(5)   | O4-Co2-N10  | 88.27(17)  |
|           | Co2-O4    | 2.052(4)   | O4-Co2-O3   | 102.31(16) |
|           | Co2-N9    | 2.083(4)   | O4-Co2-N7   | 157.78(16) |
| <b>9</b>  | Co2-N12   | 2.071(4)   | O4-Co2-N12  | 89.02(16)  |
|           | Co2-N10   | 2.251(5)   | N9-Co2-N10  | 109.63(17) |
|           | O1-Co1-O2 | 102.72(16) | N9-Co2-N7   | 76.05(17)  |
|           | O1-Co1-N4 | 159.95(15) | N9-Co2-N12  | 172.20(18) |
|           | O1-Co1-N1 | 90.52(16)  | N10-Co2-N7  | 85.43(16)  |
|           | O1-Co1-N6 | 86.39(15)  | N10-Co2-N12 | 76.27(17)  |
|           | O1-Co1-N3 | 88.25(15)  | O3-Co2-N9   | 88.57(15)  |
|           | O2-Co1-N4 | 87.62(15)  | O3-Co2-N10  | 159.70(16) |
|           | O2-Co1-N1 | 158.38(16) | O3-Co2-N7   | 90.54(16)  |
|           | O2-Co1-N6 | 90.40(15)  | O3-Co2-N12  | 86.51(15)  |
|           | O2-Co1-N3 | 87.10(15)  | N7-Co2-N12  | 110.02(17) |
|           | Cu1-O1    | 1.921(5)   | O1-Cu1-N4   | 93.1(2)    |
|           | Cu1-N4    | 1.934(6)   | O1-Cu1-N2   | 166.0(2)   |
| <b>10</b> | Cu1-N2    | 1.977(6)   | N4-Cu1-N2   | 80.3(3)    |
|           | Cu1-N6    | 2.029(6)   | O1-Cu1-N6   | 87.3(2)    |
|           | Cu1-N5    | 2.344(6)   | N4-Cu1-N6   | 179.5(2)   |



|    |             |          |             |          |
|----|-------------|----------|-------------|----------|
|    | Cu2-O2      | 1.934(5) | N2-Cu1-N6   | 99.4(2)  |
|    | Cu2-N10     | 1.939(6) | O1-Cu1-N5   | 99.2(2)  |
|    | Cu2-N8      | 2.000(6) | N4-Cu1-N5   | 103.3(2) |
|    | Cu2-N11     | 2.017(6) | N2-Cu1-N5   | 94.3(2)  |
|    | Cu2-N12     | 2.322(6) | N6-Cu1-N5   | 76.4(2)  |
|    | O2-Cu2-N10  | 92.5(2)  | O2-Cu2-N8   | 163.7(2) |
|    | N10-Cu2-N8  | 79.8(2)  | O2-Cu2-N11  | 89.5(2)  |
|    | N10-Cu2-N11 | 176.4(2) | N8-Cu2-N11  | 99.0(2)  |
|    | O2-Cu2-N12  | 106.8(2) | N10-Cu2-N12 | 99.8(2)  |
|    | N8-Cu2-N12  | 88.8(2)  | N11-Cu2-N12 | 76.8(2)  |
|    | Cu1-O2      | 1.925(5) | O2-Cu1-N4   | 91.6(2)  |
|    | Cu1-N4      | 1.948(6) | O2-Cu1-N5   | 88.4(2)  |
|    | Cu1-N5      | 2.007(6) | N4-Cu1-N5   | 175.5(3) |
|    | Cu1-N2      | 2.011(6) | O2-Cu1-N2   | 156.8(2) |
|    | Cu1-N6      | 2.283(7) | N4-Cu1-N2   | 80.2(3)  |
|    | Cu2-O5      | 1.926(5) | N5-Cu1-N2   | 101.5(2) |
|    | Cu2-N10     | 1.936(6) | O2-Cu1-N6   | 106.9(2) |
|    | Cu2-N12     | 2.003(6) | N4-Cu1-N6   | 97.9(3)  |
|    | Cu2-N8      | 2.020(6) | N5-Cu1-N6   | 77.9(2)  |
|    | Cu2-N11     | 2.306(6) | N2-Cu1-N6   | 95.7(2)  |
|    | Cu3-O8      | 1.922(5) | O5-Cu2-N10  | 91.8(2)  |
|    | Cu3-N16     | 1.950(6) | O5-Cu2-N12  | 90.8(2)  |
|    | Cu3-N14     | 2.013(6) | N10-Cu2-N12 | 174.3(3) |
|    | Cu3-N18     | 2.018(6) | O5-Cu2-N8   | 154.7(2) |
|    | Cu3-N17     | 2.266(7) | N10-Cu2-N8  | 79.2(3)  |
| 11 | Cu4-O11     | 1.904(5) | N12-Cu2-N8  | 100.6(2) |
|    | Cu4-N22     | 1.936(6) | O5-Cu2-N11  | 105.6(2) |
|    | Cu4-N20     | 2.010(6) | N10-Cu2-N11 | 97.0(2)  |
|    | Cu4-N23     | 2.020(5) | N12-Cu2-N11 | 77.3(2)  |
|    | Cu4-N24     | 2.285(6) | N8-Cu2-N11  | 99.0(2)  |
|    | O8-Cu3-N16  | 91.6(3)  | O11-Cu4-N22 | 92.6(3)  |
|    | O8-Cu3-N14  | 157.5(2) | O11-Cu4-N20 | 156.3(2) |
|    | N16-Cu3-N14 | 80.1(3)  | N22-Cu4-N20 | 79.8(3)  |
|    | O8-Cu3-N18  | 88.9(2)  | O11-Cu4-N23 | 89.3(2)  |
|    | N16-Cu3-N18 | 176.3(3) | N22-Cu4-N23 | 173.2(3) |
|    | N14-Cu3-N18 | 100.8(3) | N20-Cu4-N23 | 100.8(2) |
|    | O8-Cu3-N17  | 103.9(2) | O11-Cu4-N24 | 105.7(2) |
|    | N16-Cu3-N17 | 98.2(3)  | N22-Cu4-N24 | 96.1(2)  |
|    | N14-Cu3-N17 | 97.9(3)  | N20-Cu4-N24 | 97.5(2)  |
|    | N18-Cu3-N17 | 78.2(3)  | N23-Cu4-N24 | 77.2(2)  |
| 12 | Cu1-N4      | 1.921(5) | N4-Cu1-O1   | 92.6(2)  |

|    |             |          |             |          |
|----|-------------|----------|-------------|----------|
|    | Cu1-O1      | 1.925(3) | N4-Cu1-N6   | 174.9(2) |
|    | Cu1-N6      | 2.001(5) | O1-Cu1-N6   | 88.5(2)  |
|    | Cu1-N2      | 2.028(5) | N4-Cu1-N2   | 79.9(2)  |
|    | Cu1-N5      | 2.295(4) | O1-Cu1-N2   | 155.5(2) |
|    | Cu2-O3      | 1.915(4) | N6-Cu1-N2   | 101.2(2) |
|    | Cu2-N10     | 1.953(6) | N4-Cu1-N5   | 97.0(2)  |
|    | Cu2-N8      | 2.002(6) | O1-Cu1-N5   | 108.4(2) |
|    | Cu2-N12     | 2.022(5) | N6-Cu1-N5   | 78.0(2)  |
|    | Cu2-N11     | 2.290(5) | N2-Cu1-N5   | 95.7(2)  |
|    | O3-Cu2-N10  | 91.4(2)  | O3-Cu2-N8   | 151.2(2) |
|    | N10-Cu2-N8  | 79.9(3)  | O3-Cu2-N12  | 90.5(2)  |
|    | N10-Cu2-N12 | 171.3(2) | N8-Cu2-N12  | 102.3(2) |
|    | O3-Cu2-N11  | 115.0(2) | N10-Cu2-N11 | 94.2(2)  |
|    | N8-Cu2-N11  | 93.2(2)  | N12-Cu2-N11 | 77.3(2)  |
|    | Cu1-O1      | 1.940(3) | O1-Cu1-N6   | 92.7(1)  |
|    | Cu1-N4      | 2.079(3) | O1-Cu1-N1   | 87.6(1)  |
|    | Cu1-N1      | 2.014(3) | N6-Cu1-N1   | 171.6(1) |
|    | Cu1-N2      | 2.315(3) | O1-Cu1-N4   | 165.4(1) |
|    | Cu1-N6      | 1.946(3) | N6-Cu1-N4   | 79.8(1)  |
|    | Cu2-O2      | 1.942(2) | N1-Cu1-N4   | 101.6(1) |
|    | Cu2-N10     | 2.059(3) | O1-Cu1-N2   | 103.4(1) |
|    | Cu2-N12     | 1.938(3) | N6-Cu1-N2   | 94.8(1)  |
|    | Cu2-N8      | 2.009(3) | N1-Cu1-N2   | 77.0(1)  |
|    | Cu2-N7      | 2.251(3) | N4-Cu1-N2   | 89.8(1)  |
|    | Cu3-O3      | 1.939(2) | O2-Cu2-N12  | 91.9(1)  |
| 13 | Cu3-N16     | 2.045(3) | N8-Cu2-N12  | 178.4(1) |
|    | Cu3-N13     | 2.252(3) | N8-Cu2-O2   | 177.0(5) |
|    | Cu3-N14     | 2.014(2) | O2-Cu2-N8   | 86.9(1)  |
|    | Cu3-N18     | 1.939(3) | N12-Cu2-N10 | 80.4(1)  |
|    | O2-Cu2-N7   | 99.1(1)  | O2-Cu2-N10  | 162.8(1) |
|    | N8-Cu2-N7   | 78.6(1)  | N8-Cu2-N10  | 101.0(1) |
|    | N10-Cu2-N7  | 97.5(1)  | N14-Cu3-N16 | 102.7(1) |
|    | N18-Cu3-N14 | 173.0(1) | N18-Cu3-N13 | 94.9(1)  |
|    | O3-Cu3-N18  | 92.3(1)  | O3-Cu3-N13  | 102.4(1) |
|    | O3-Cu3-N14  | 86.6(1)  | N14-Cu3-N13 | 78.7(1)  |
|    | N16-Cu3-N18 | 80.5(1)  | N16-Cu3-N13 | 95.7(1)  |
|    | O3-Cu3-N16  | 161.1(1) |             |          |

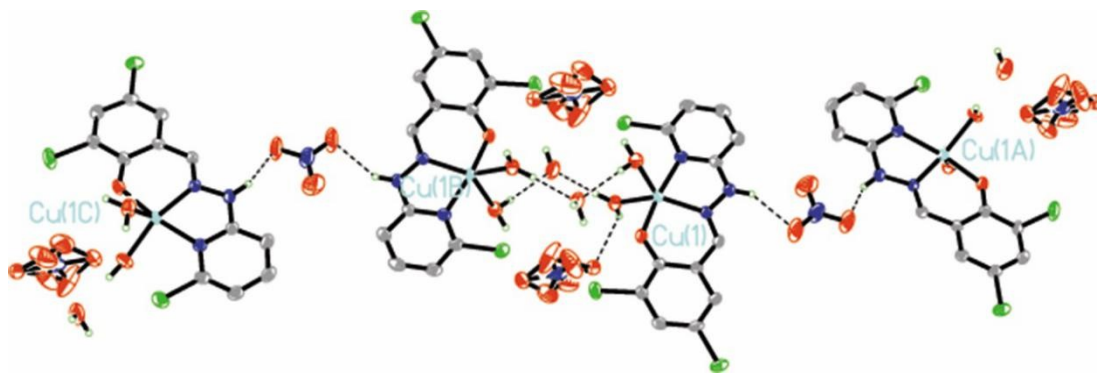

**Figure S1.** 1D chain of **1**, part H atoms were omitted for clarity.

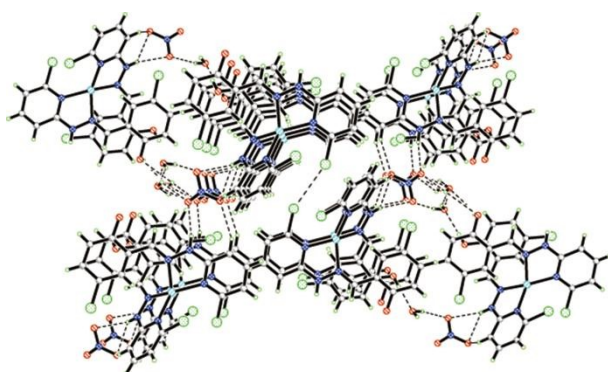

**Figure S2.** 3D network of **2**.

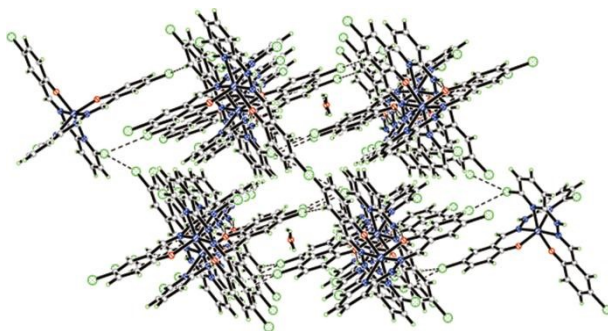

**Figure S3.** 3D network of **6**.

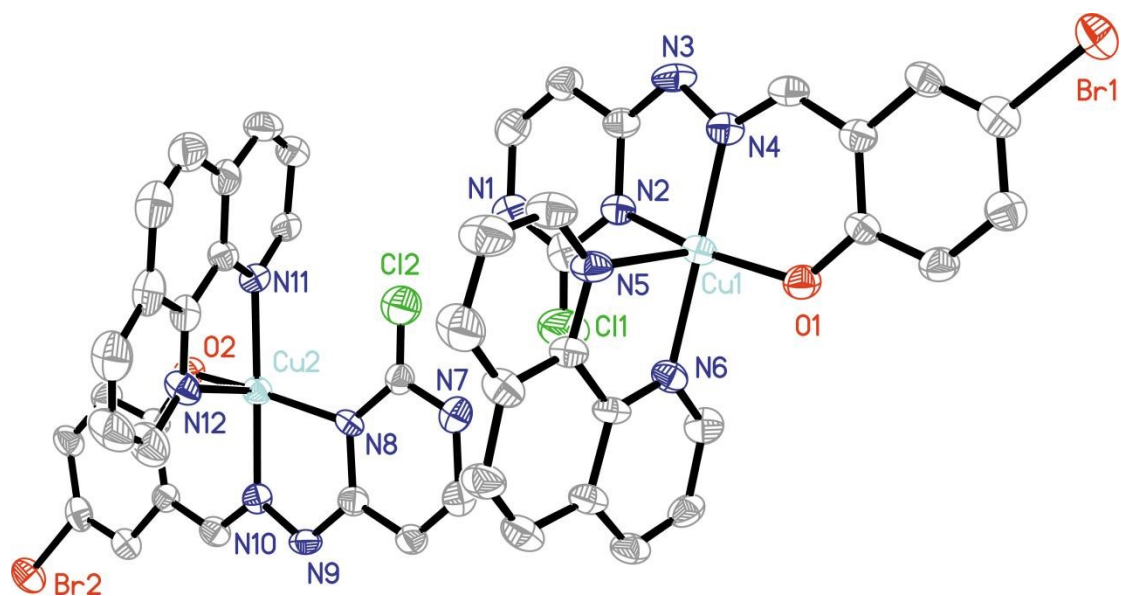

**Figure S4.** The molecular structure of **10**, with the H atoms, and lattice solvent molecules were omitted for clarity. Displacement ellipsoids are drawn at the 30% probability level.

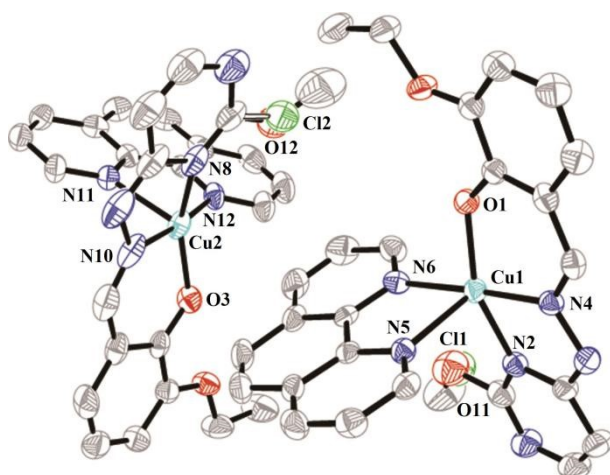

**Figure S5.** The molecular structure of **12**, with the H atoms, and solvent molecules were omitted for clarity. Displacement ellipsoids are drawn at the 30% probability level.

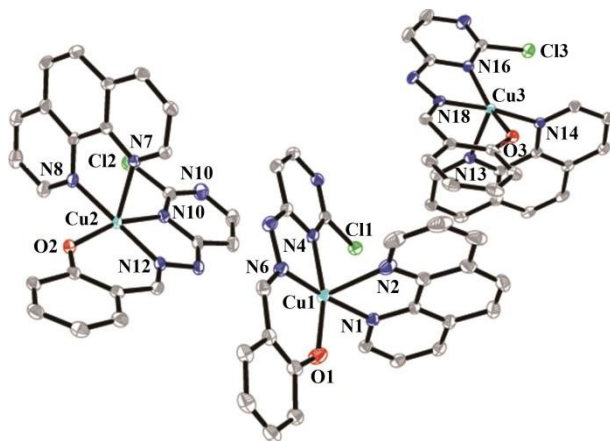

**Figure S6.** The molecular structure of **13**, with the H atoms, and solvent molecules were omitted for clarity. Displacement ellipsoids are drawn at the 30% probability level.

Table S4. Hydrogen bond lengths (Å) and angles (°) for **11**.

| <i>D</i> - H... <i>A</i>      | <i>D</i> - H | H... <i>A</i> | <i>D</i> ... <i>A</i> | <i>D</i> - H... <i>A</i> |
|-------------------------------|--------------|---------------|-----------------------|--------------------------|
| O18-H18A...N15                | 0.850        | 2.040         | 2.868                 | 164.44                   |
| O18-H18B...N9                 | 0.850        | 2.022         | 2.863                 | 169.90                   |
| O19-H19A...O7                 | 0.850        | 2.054         | 2.819                 | 149.44                   |
| O19-H19B...N19                | 0.850        | 2.063         | 2.852                 | 154.24                   |
| O17-H17A...O18                | 0.850        | 2.014         | 2.763                 | 146.51                   |
| O17-H17B...O20 <sup>i</sup>   | 0.850        | 1.999         | 2.836                 | 168.23                   |
| O14-H14A...O3                 | 0.881        | 2.236         | 3.0003                | 145.50                   |
| O14-H14B...O2                 | 0.883        | 2.441         | 3.221                 | 147.52                   |
| O16-H16A...O17                | 0.850        | 2.031         | 2.803                 | 150.61                   |
| O16-H16B...O19 <sup>ii</sup>  | 0.850        | 1.970         | 2.817                 | 178.81                   |
| O15-H15A...O13                | 0.850        | 2.098         | 2.816                 | 142.00                   |
| O15-H15B...O14                | 0.850        | 2.343         | 2.882                 | 121.62                   |
| O1W-H1WA...O16 <sup>iii</sup> | 0.850        | 2.159         | 2.812                 | 133.52                   |
| O13-H13F...N3 <sup>iii</sup>  | 0.850        | 2.040         | 2.876                 | 167.63                   |
| O13-H13G...N21 <sup>iv</sup>  | 0.850        | 2.056         | 2.886                 | 164.99                   |
| O20-H20A...O5                 | 0.842        | 2.195         | 2.921                 | 144.38                   |
| O20-H20B...O6                 | 0.844        | 2.199         | 2.842                 | 133.00                   |

Symmetry codes: (i)  $1-x, y-1/2, 1-z$ ; (ii)  $1-x, y-1/2, 2-z$ ; (iii)  $-x, y-1/2, 1-z$ ; (iv)  $x-1, y-1, z-1$ .

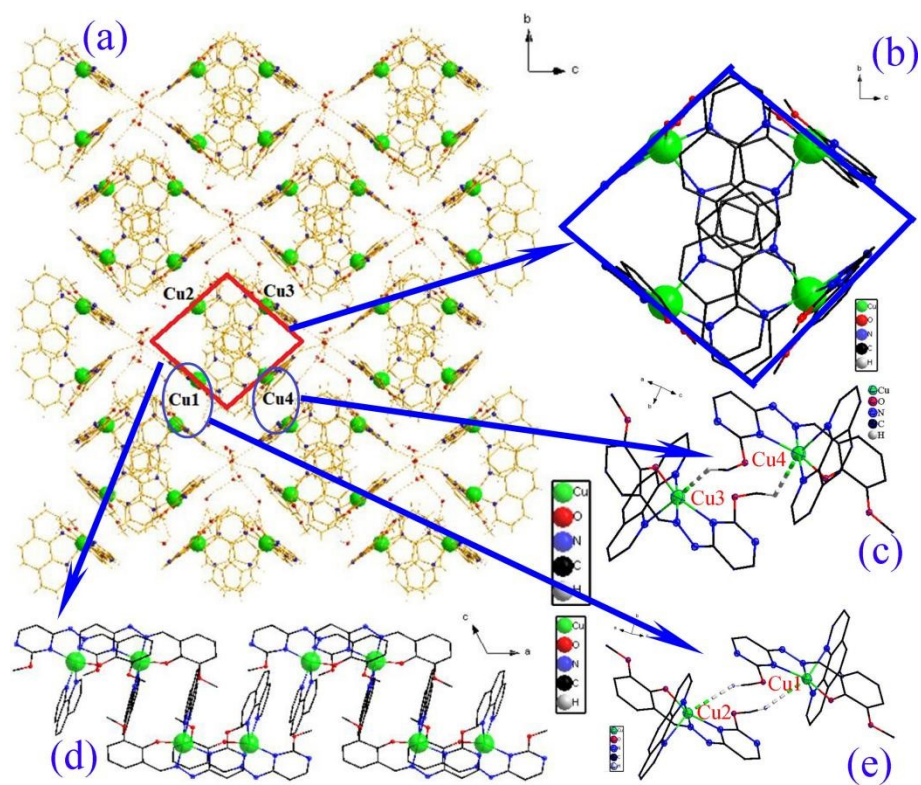

Figure S7. 3D network of **11** (a); 1D chain of **11** in a direction (b); 1D chain of **11** in b direction (d); Cu...H interaction of **11** (c,e).

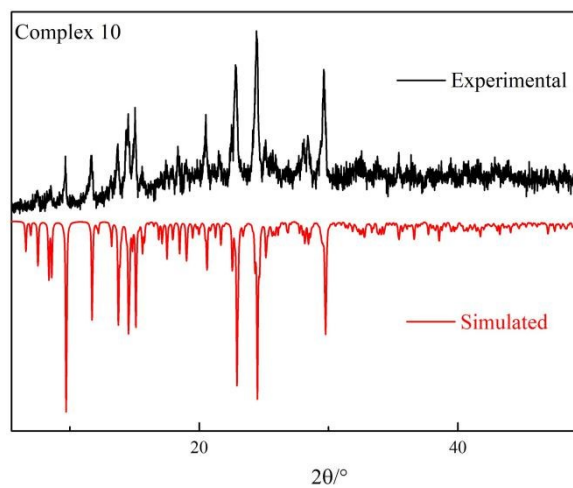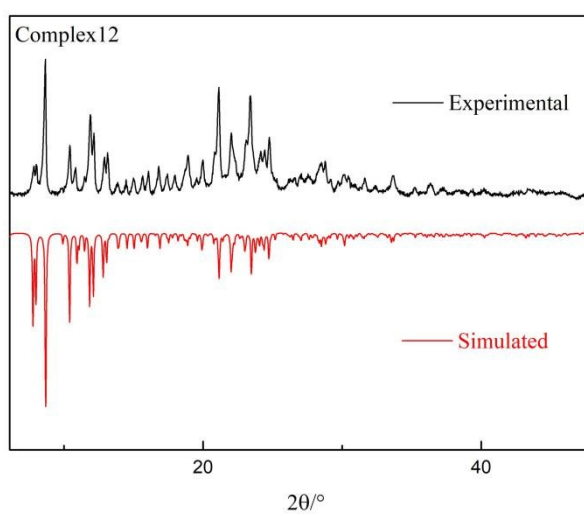

Figure S8. XRD of the complexes 10 and 12.

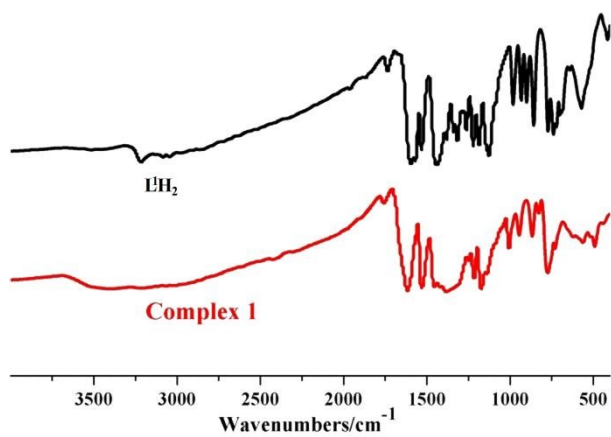

Figure S9. IR (KBr) spectra of 1 and L<sup>1</sup>H<sub>2</sub>.

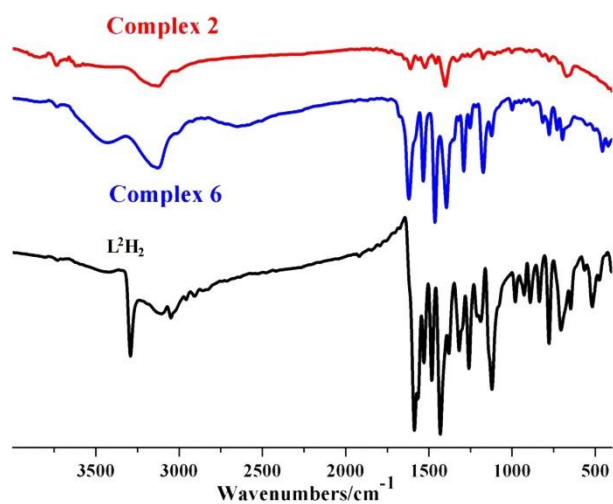

**Figure S10.** IR (KBr) spectra of 2, 6 and L<sup>2</sup>H<sub>2</sub>.

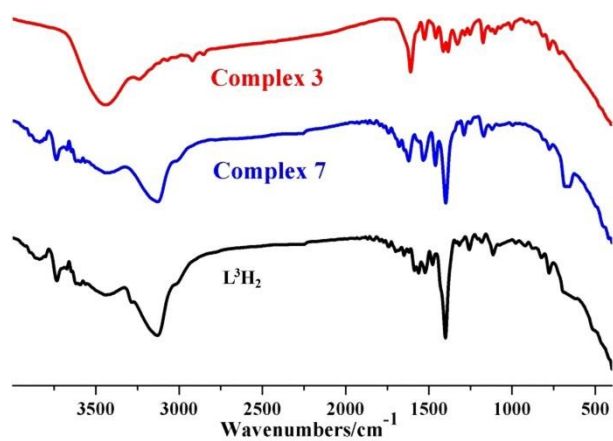

**Figure S11.** IR (KBr) spectra of 3,7 and L<sup>3</sup>H<sub>2</sub>.

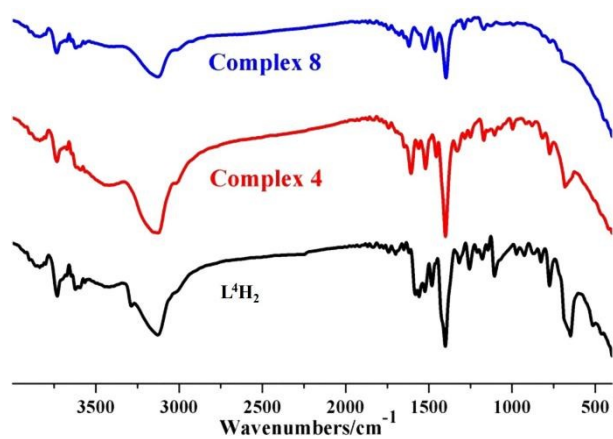

**Figure S12.** IR (KBr) spectra of 4,8 and L<sup>4</sup>H<sub>2</sub>.



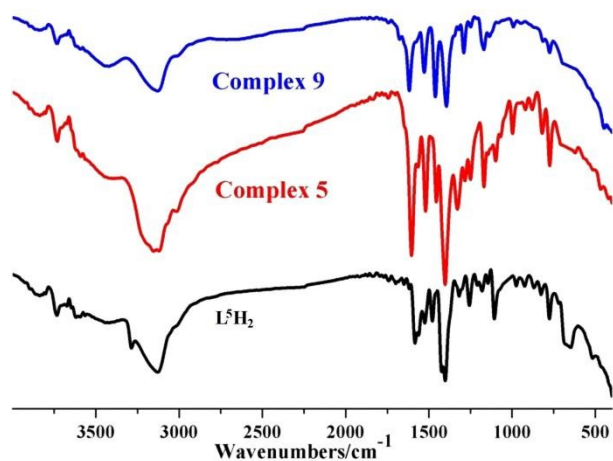

**Figure S13.** IR (KBr) spectra of **5,9** and L<sup>5</sup>H<sub>2</sub>.

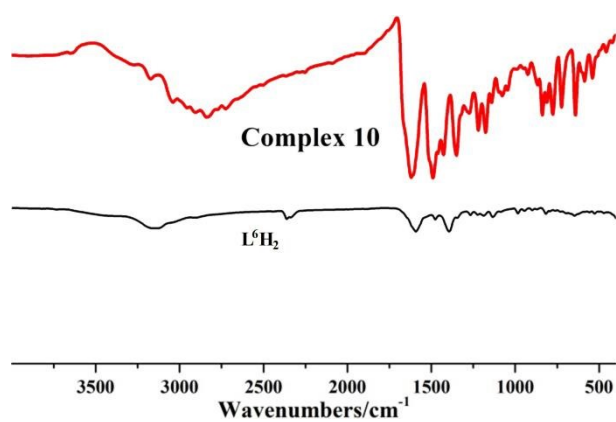

**Figure S14.** IR (KBr) spectra of **10** and L<sup>6</sup>H<sub>2</sub>.

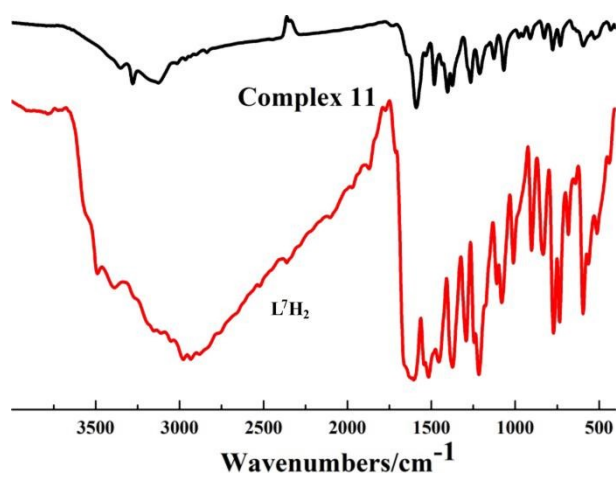

**Figure S15.** IR (KBr) spectra of **11** and L<sup>7</sup>H<sub>2</sub>.

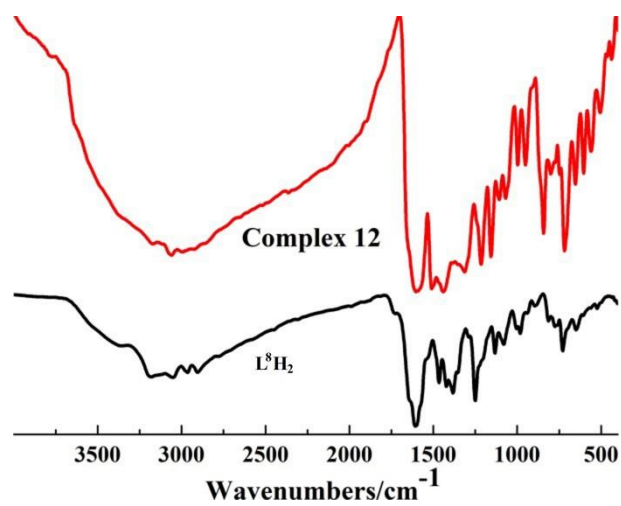

**Figure S16.** IR (KBr) spectra of **12** and L<sup>8</sup>H<sub>2</sub>.

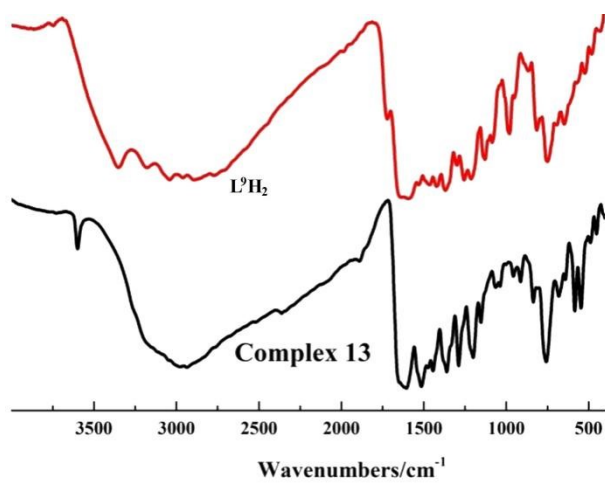

**Figure S17.** IR (KBr) spectra of **13** and L<sup>9</sup>H<sub>2</sub>.

**Table S5.** IC<sub>50</sub> (μM) values determined by MTT assay of salicylaldehyde Schiff-bases (L<sup>1-9</sup>H<sub>2</sub>) and 1,10-phenanthroline (phen) ligands against A549 and A549/DDP cells for 24 h.

| complexes                     | A549 | A549/DDP | HL-7702 |
|-------------------------------|------|----------|---------|
| L <sup>1</sup> H <sub>2</sub> | >50  | >50      | >50     |
| L <sup>2</sup> H <sub>2</sub> | >50  | >50      | >50     |
| L <sup>3</sup> H <sub>2</sub> | >50  | >50      | >50     |
| L <sup>4</sup> H <sub>2</sub> | >50  | >50      | >50     |
| L <sup>5</sup> H <sub>2</sub> | >50  | >50      | >50     |
| L <sup>6</sup> H <sub>2</sub> | >50  | >50      | >50     |
| L <sup>7</sup> H <sub>2</sub> | >50  | >50      | >50     |
| L <sup>8</sup> H <sub>2</sub> | >50  | >50      | >50     |
| L <sup>9</sup> H <sub>2</sub> | >50  | >50      | >50     |
| phen                          | >50  | >50      | >50     |

|                                                      |     |     |     |
|------------------------------------------------------|-----|-----|-----|
| Cu(NO <sub>3</sub> ) <sub>2</sub> ·3H <sub>2</sub> O | >50 | >50 | >50 |
|------------------------------------------------------|-----|-----|-----|

|           | mg/kg | 1day                            | 3d                              |             |       | 5d                              |              |       | 7d                              |               |       |
|-----------|-------|---------------------------------|---------------------------------|-------------|-------|---------------------------------|--------------|-------|---------------------------------|---------------|-------|
|           |       | Tumor Volume (mm <sup>3</sup> ) | Tumor Volume (mm <sup>3</sup> ) | RTV         | T/C%  | Tumor Volume (mm <sup>3</sup> ) | RTV          | T/C%  | Tumor Volume (mm <sup>3</sup> ) | RTV           | T/C % |
| control   | -     | 90.6±8.0                        | 164.3±31.0                      | 1.825±0.388 | 100.0 | 332.0±45.4                      | 3.692±0.633  | 100.0 | 539.5±64.4                      | 5.976±0.733   | 100.0 |
| <b>11</b> | 5.0   | 91.7±3.2                        | 160.0±9.5                       | 1.748±0.124 | 97.4  | 293.6±36.3                      | 3.213±0.477  | 87.0  | 426.5±59.0*                     | 4.662±0.720*  | 79.1  |
| <b>13</b> | 5.0   | 91.4±5.5                        | 157.2±18.7                      | 1.716±0.123 | 94.0  | 266.2±24.9*                     | 2.934±0.444* | 79.5  | 369.9±33.9**                    | 4.076±0.619** | 68.6  |

**Table S6.** The tumor volume in treated and non-treated mice from the date of surgery to the study end point in the A549/DDP xenograft model.

|           | mg/kg | 9d                              |               |       | 11d                             |               |       | 13d                             |               |       |
|-----------|-------|---------------------------------|---------------|-------|---------------------------------|---------------|-------|---------------------------------|---------------|-------|
|           |       | Tumor Volume (mm <sup>3</sup> ) | RTV           | T/C % | Tumor Volume (mm <sup>3</sup> ) | RTV           | T/C%  | Tumor Volume (mm <sup>3</sup> ) | RTV           | T/C%  |
| control   | -     | 694.1±75.5                      | 7.683±0.787   | 100.0 | 860.1±96.0                      | 9.528±1.099   | 100.0 | 1069.0±180.5                    | 11.783±1.462  | 100.0 |
| <b>11</b> | 5.0   | 471.2±61.4**                    | 5.150±0.754** | 67.9  | 523.3±58.6**                    | 5.723±0.774** | 60.8  | 587.0±62.3**                    | 6.418±0.812** | 54.9  |
| <b>13</b> | 5.0   | 434.8±46.2**                    | 4.793±0.787** | 62.6  | 482.2±50.9**                    | 5.315±0.864** | 56.1  | 519.3±59.1**                    | 5.720±0.965** | 48.6  |

|           | mg/kg | 15d                             |               |       |
|-----------|-------|---------------------------------|---------------|-------|
|           |       | Tumor Volume (mm <sup>3</sup> ) | RTV           | T/C%  |
| control   | -     | 1246.9±103.9                    | 13.768±1.522  | 100.0 |
| <b>11</b> | 5.0   | 631.3±61.4**                    | 6.899±0.780** | 50.6  |
| <b>13</b> | 5.0   | 546.4±75.6**                    | 6.022±1.109** | 43.8  |

\*  $p < 0.05$ , \*\*  $p < 0.01$ ,  $p$  vs vehicle control (5.0% v/v DMSO/ saline vehicle).

**Table S7.** Average body weight in treated and non-treated mice from the date of surgery to the study end point in the A549/DDP xenograft model.

|           | mg/kg | 1 d      | 3 d      | 5 d      | 7 d      | 9 d      | 11 d     | 13 d     | 15 d     |
|-----------|-------|----------|----------|----------|----------|----------|----------|----------|----------|
| control   | -     | 19.3±0.6 | 19.4±0.6 | 19.6±0.6 | 19.7±0.6 | 19.9±0.6 | 20.0±0.5 | 20.1±0.5 | 20.2±0.5 |
| <b>11</b> | 5.0   | 19.2±0.5 | 19.3±0.5 | 19.5±0.5 | 19.5±0.5 | 19.7±0.5 | 19.9±0.4 | 20.0±0.4 | 20.1±0.4 |
| <b>13</b> | 5.0   | 19.3±0.5 | 19.4±0.5 | 19.5±0.5 | 19.7±0.5 | 19.8±0.5 | 19.9±0.5 | 20.0±0.4 | 20.1±0.4 |

\*  $p < 0.05$ , \*\*  $p < 0.01$ ,  $p$  vs vehicle control (5.0% v/v DMSO/ saline vehicle).

**Table S8.** In Vivo Anticancer Activity of **11** and **13** toward A549/DDP Tumor Xenograft.

|           | mg/kg | average tumor weight (mean $\pm$ SD, g) | inhibition of tumor growth (%) |
|-----------|-------|-----------------------------------------|--------------------------------|
| control   | -     | 1.303 $\pm$ 0.100                       | —                              |
| <b>11</b> | 5.0   | 0.653 $\pm$ 0.060**                     | 49.9                           |
| <b>13</b> | 5.0   | 0.570 $\pm$ 0.105**                     | 56.3                           |

\*  $p < 0.05$ , \*\*  $p < 0.01$ ,  $p$  vs vehicle control (5.0% v/v DMSO/ saline vehicle).

## **Methods**

The A549/DDP xenograft mouse models were purchased from Changzhou Cavens Experimental Animal Co., Ltd (Jiangsu, China, Approval No. SCXK 2016-0010). The animal procedures were approved by Changzhou Cavens Experimental Animal Co., Ltd (Jiangsu, China, Approval No. 2017-0040). Further, all the experimental procedures were conducted in accordance with the NIH Guidelines for the Care and Use of Laboratory Animals. Animal experiments were approved by Changzhou Cavens Experimental Animal Co., Ltd ((Jiangsu, China).

## **Syntheses**

### **4.2 Syntheses of $L^nH_2$ ( $n = 1-9$ )**

#### **4.2.1 Syntheses of $L^1H_2$**

A mixture of 3,5-dichloro-2-hydroxy-benzaldehyde (10 mmol, 1.9101 g), (6-chloro-pyridin-2-yl)-hydrazine (Hcph, 10 mmol, 1.4353 g) and ethanol (20 mL) in a 100 mL flask refluxed at 80 °C for 1 h. Beige precipitate appeared and then was rinsed three times with fresh ethanol (10 mL  $\times$  3) and dried at 50 °C for 24 h (yield: 3.0072 g, *ca.* 95 % based on Hcph). *Anal. Calc.* for  $L^1H_2$ :  $C_{12}H_8Cl_3N_3O$  ( $M_r = 316.55$ ), *calc.*: C, 45.53; H, 2.55; N, 13.27 %; Found: C, 45.48; H, 2.61; N, 13.32. IR data for  $L^1H_2$  (KBr,  $cm^{-1}$ , Fig. S9): 3288 s, 3052 s, 1578 s, 1527 s, 1482 s, 1423 m, 1314 m, 1257 s, 1183 s, 1147 m, 1104 s, 974 m, 875 m, 872 m, 776 m, 646 m, 521 w.

#### **4.2.2 Syntheses of $L^2H_2$**

$L^2H_2$  was prepared in a similar way to  $L^1H_2$ , except that 3,5-dichloro-2-hydroxy-benzaldehyde was replaced by 5-chloro-2-hydroxy-benzaldehyde. Beige precipitate appeared and then was rinsed three times with fresh ethanol (10 mL  $\times$  3) and dried at 50 °C for 24 h (yield: 2.6518 g, *ca.* 94 % based on Hcph). *Anal. Calc.* for  $L^2H_2$ :  $C_{12}H_9Cl_2N_3O$  ( $M_r = 282.10$ ), *calc.*: C, 51.09; H, 3.22; N, 14.89 %; Found: C, 51.03; H, 3.29; N, 14.94. IR data for  $L^2H_2$  (KBr,  $cm^{-1}$ , Fig. S10): 3288 w, 3052 s, 1578 w, 1527 w, 1482 w, 1423 w, 1314 m, 1257 w,



1183 m, 1194 w, 974 w, 931 s, 875 s, 776 s, 646 w, 521 s.

#### 4.2.3 Syntheses of $L^3H_2$

$L^3H_2$  was prepared in a similar way to  $L^1H_2$ , except that 3,5-dichloro-2-hydroxy-benzaldehyde was replaced by 5-Bromo-2-hydroxy-benzaldehyde. Beige precipitate appeared and then was rinsed three times with fresh ethanol (10 mL  $\times$  3) and dried at 50 °C for 24 h (yield: 3.0044 g, *ca.* 92 % based on Hcph). *Anal. Calc.* for  $L^3H_2$ :  $C_{12}H_9BrClN_3O$  ( $M_r = 326.56$ ), *calc.*: C, 44.14; H, 2.78; N, 12.86 %; Found: C, 44.09; H, 2.82; N, 12.91. IR data for  $L^3H_2$  (KBr,  $cm^{-1}$ , Fig. S11): 3288 w, 3052 s, 1578 w, 1527 w, 1482 w, 1423 w, 1314 m, 1257 w, 1183 m, 1147 s, 1104 w, 974 w, 931 s, 875 s, 776 s, 646 w, 521 s.

#### 4.2.4 Syntheses of $L^4H_2$

$L^4H_2$  was prepared in a similar way to  $L^2H_2$ , except that 6-Bromo-pyridin-2-yl)-hydrazine (Hbph) was replaced by (6-Chloro-pyridin- 2-yl)-hydrazine. Beige precipitate appeared and then was rinsed three times with fresh ethanol (10 mL  $\times$  3) and dried at 50 °C for 24 h (yield: 3.1350 g, *ca.* 96 % based on Hbph). *Anal. Calc.* for  $L^4H_2$ :  $C_{12}H_9BrClN_3O$  ( $M_r = 326.56$ ), *calc.*: C, 44.14; H, 2.78; N, 12.86 %; Found: C, 44.02; H, 2.86; N, 12.93. IR data for  $L^4H_2$  (KBr,  $cm^{-1}$ , Fig. S12): 3444s, 3288s, 3052s, 1578w, 1527w, 1482w, 1423w, 1314w, 1257s, 1183s, 1147s, 1104s, 974s, 931s, 875s, 827s, 776s, 646s, 521s.

#### 4.2.5 Syntheses of $L^5H_2$

$L^5H_2$  was prepared in a similar way to  $L^4H_2$ , except that 5-Chloro-2-hydroxy-benzaldehyde was replaced by 5-Bromo-2-hydroxy- benzaldehyde. Beige precipitate appeared and then was rinsed three times with fresh ethanol (10 mL  $\times$  3) and dried at 50 °C for 24 h (yield: 3.3391 g, *ca.* 93 % based on Hbph). *Anal. Calc.* for  $L^5H_2$ :  $C_{12}H_9Br_2N_3O$  ( $M_r = 371.01$ ), *calc.*: C, 38.85; H, 2.41; N, 11.29 %; Found: C, 38.81; H, 2.43; N, 11.32. IR data for  $L^5H_2$  (KBr,  $cm^{-1}$ , Fig. S13): 3444 s, 3288 m, 3052 s, 1578 w, 1482 w, 1482 s, 1423 w, 1314 w, 1257 s, 1183 w, 1147 s, 1104 w, 974 s, 875 s, 827 s, 776 s, 646 s, 521 s.

#### 4.2.6 Syntheses of $L^6H_2$

$L^6H_2$  was prepared in a similar way to  $L^3H_2$ , except that (6-chloro-pyridin-2-yl)- hydrazine

was replaced by (2-Chloro-pyrimidin-4-yl)-hydrazine(Hcpmh). Beige precipitate appeared and then was rinsed three times with fresh ethanol (10 mL × 3) and dried at 50 °C for 24 h (yield: 3.1118 g, *ca.* 95 % based on Hcpmh). *Anal. Calc.* for L<sup>6</sup>H<sub>2</sub>: C<sub>11</sub>H<sub>8</sub>BrClN<sub>4</sub>O (*M<sub>r</sub>* = 327.56), *calc.*: C, 40.33; H, 2.46; N, 17.10 %; Found: C, 40.26; H, 2.54; N, 17.19. IR data for L<sup>6</sup>H<sub>2</sub> (KBr, cm<sup>-1</sup>, Fig. S14): 3166 w, 2833 w, 1709 w, 1619 s, 1426 w, 1347 m, 1137 s, 1039 s, 984 w, 774 m, 643 s, 532 w.

#### 4.2.7 Syntheses of L<sup>7</sup>H<sub>2</sub>

L<sup>7</sup>H<sub>2</sub> was prepared in a similar way to L<sup>6</sup>H<sub>2</sub>, except that 5-Bromo-2-hydroxy-benzaldehyde was replaced by 2-Hydroxy-3-methoxy-benzaldehyde. Beige precipitate appeared and then was rinsed three times with fresh ethanol (10 mL × 3) and dried at 50 °C for 24 h (yield: 2.6754 g, *ca.* 96 % based on Hcpmh). *Anal. Calc.* for L<sup>7</sup>H<sub>2</sub>: C<sub>12</sub>H<sub>11</sub>ClN<sub>4</sub>O<sub>2</sub> (*M<sub>r</sub>* = 278.69), *calc.*: C, 51.72; H, 3.98; N, 20.10 %; Found: C, 57.66; H, 4.07; N, 20.16. IR data for L<sup>7</sup>H<sub>2</sub> (KBr, cm<sup>-1</sup>, Fig. S15): 3390 w, 2976 w, 31603 m, 1456 w, 1371 m, 1290 m, 1217 s, 1075 w, 1009 m, 902 s, 834 m, 773 s, 732 m, 594 s, 511 w.

#### 4.2.8 Syntheses of L<sup>8</sup>H<sub>2</sub>

L<sup>8</sup>H<sub>2</sub> was prepared in a similar way to L<sup>6</sup>H<sub>2</sub>, except that 5-bromo-2-hydroxy-benzaldehyde was replaced by 3-ethoxy-2-hydroxy-benzaldehyde. Beige precipitate appeared and then was rinsed three times with fresh ethanol (10 mL × 3) and dried at 50 °C for 24 h (yield: 2.7516 g, *ca.* 94 % based on Hcpmh). *Anal. Calc.* for L<sup>8</sup>H<sub>2</sub>: C<sub>12</sub>H<sub>11</sub>ClN<sub>4</sub>O<sub>2</sub> (*M<sub>r</sub>* = 292.72), *calc.*: C, 53.34; H, 4.48; N, 19.14 %; Found: C, 53.25; H, 4.55; N, 19.21. IR data for L<sup>8</sup>H<sub>2</sub> (KBr, cm<sup>-1</sup>, Fig. S16): 3191 w, 2911 w, 1609 m, 1420 w, 1384 w, 1249 m, 1136 w, 1084 w, 983 w, 929 w, 816 w, 727 s, 648 w, 520 w.

#### 4.2.9 Syntheses of L<sup>9</sup>H<sub>2</sub>

L<sup>9</sup>H<sub>2</sub> was prepared in a similar way to L<sup>6</sup>H<sub>2</sub>, except that 5-bromo-2-hydroxy-benzaldehyde was replaced by 2-hydroxy-benzaldehyde. Beige precipitate appeared and then was rinsed three times with fresh ethanol (10 mL × 3) and dried at 50 °C for 24 h (yield: 2.2629 g, *ca.* 91 % based on Hcpmh). *Anal. Calc.* for L<sup>9</sup>H<sub>2</sub>: C<sub>12</sub>H<sub>11</sub>ClN<sub>4</sub>O<sub>2</sub> (*M<sub>r</sub>* = 248.67), *calc.*: C, 53.13; H, 3.65; N, 22.53 %; Found: C, 53.08; H, 3.72; N, 22.61. IR data for L<sup>9</sup>H<sub>2</sub> (KBr, cm<sup>-1</sup>, Fig. S17): 3351

s, 3288 m, 3037 s, 1578 w, 1482 w, 1423 w, 1363 s, 1257 s, 1208 w, 1147 s, 1121 s, 974 s, 875 s, 736 s, 646 s, 521 s.

### 4.3 Syntheses of 1-13

#### 4.3.1 Syntheses of $[Cu(L^1H)(H_2O)_2] \cdot NO_3 \cdot (H_2O)$ (**1**)

A mixture of  $Cu(NO_3)_2 \cdot 3H_2O$  (0.5 mmol, 0.121 g),  $L^1H_2$  (0.5 mmol, 0.158 g), ethanol (4 mL) and deionized water (6 mL) with a pH adjusted to 6 by the addition of trimethylamine was stirred for 10 min at room temperature. The mixture was poured into a Teflon-lined autoclave (20 mL) and then heated at 80 °C for 72 h. Blue block crystals of **1** were collected by filtration, washed with deionized water (10 mL  $\times$  3) and dried in air (yield: 179 mg, *ca.* 72.3 % based on  $L^1H_2$ ). *Anal. Calc.* for **1**:  $C_{12}H_{13}N_4Cl_3O_7Cu$  ( $M_r = 495.16$ ), *calc.*: C, 29.11; H, 2.65; N, 11.31. Found: C, 29.02; H, 2.71; N, 11.36. IR data for **1** (KBr,  $cm^{-1}$ , Fig. S9): 3403 w, 1616 s, 1529 w, 1381 w, 1216 w, 1173 w, 1006 s, 945 s, 896 s, 773 w, 592 w, 490 w.

#### 4.3.2 Syntheses of $[Cu(L^2H_2)_2] \cdot (NO_3) \cdot (H_2O)_2$ (**2**)

Complex **2** was obtained by the similar route to **1**, except that  $L^1H_2$  was replaced by  $L^2H_2$ . Blue crystals of **2** were obtained (yield: 135.6 mg, *ca.* 74.73 % based on  $L^2H_2$ ). *Anal. Calc.* for **2**:  $C_{24}H_{22}Cl_4CuN_7O_7$  ( $M_r = 725.83$ ), *calc.*: C, 39.72; H, 3.06; N, 13.50. Found: C, 39.65; H, 3.12; N, 13.56. IR data for **2** (KBr,  $cm^{-1}$ , Fig. S10): 3444 s, 3288 w, 3052 s, 1578 s, 1527 w, 1482 w, 1423 w, 1314 m, 1257 w, 1183 m, 1147 s, 1104 s, 974 w, 931 s, 875 s, 776 s, 646 w, 521 w.

#### 4.3.3 Syntheses of $[Cu(L^3H_2)_2] \cdot (NO_3) \cdot (H_2O)_2$ (**3**)

Complex **3** was obtained by the similar route to **1**, except that  $L^1H_2$  was replaced by  $L^3H_2$ . Blue crystals of **3** were obtained (yield: 155.45 mg, *ca.* 76.32 % based on  $L^3H_2$ ). *Anal. Calc.* for **3**:  $C_{24}H_{22}Br_2Cl_2CuN_7O_7$  ( $M_r = 814.75$ ), *calc.*: C, 35.38; H, 2.72; N, 12.03. Found: C, 35.33; H, 2.79; N, 12.14. IR data for **3** (KBr,  $cm^{-1}$ , Fig. S11): 3444 s, 3288 s, 3052 m, 1578 s, 1527 s, 1482 w, 1423 w, 1314 m, 1257 w, 1183 m, 1147 m, 1104 m, 974 w, 931 m, 875 w, 776 w, 646 w, 521 w.

#### 4.3.4 Syntheses of $[Cu(L^4H_2)_2] \cdot (NO_3) \cdot (H_2O)_2$ (**4**)

Complex **4** was obtained by the similar route to **1**, except that  $L^1H_2$  was replaced by  $L^4H_2$ . Blue crystals of **4** were obtained (yield: 154.07 mg, *ca.* 75.64 % based on  $L^4H_2$ ). *Anal. Calc.* for **4**:  $C_{24}H_{22}Br_2Cl_2CuN_7O_7$  ( $M_r = 814.75$ ), *calc.*: C, 35.38; H, 2.72; N, 12.03. Found: C, 35.31; H, 2.77; N, 12.11. IR data for **4** (KBr,  $cm^{-1}$ , Fig. S12): 3440 w, 3288 m, 3052 m, 1665 s, 1525 s, 1456 m, 1293 s, 1175 m, 1124 m, 1108 m, 977 w, 935 m, 873 w, 778 w, 648 w, 523 w.

#### 4.3.5 Syntheses of $[Cu(L^5H_2)_2] \cdot (NO_3) \cdot (H_2O)_2$ (**5**)

Complex **5** was obtained by the similar route to **1**, except that  $L^1H_2$  was replaced by  $L^5H_2$ . Blue crystals of **5** were obtained (yield: 163.54 mg, *ca.* 75.64 % based on  $L^5H_2$ ). *Anal. Calc.* for **5**:  $C_{24}H_{22}Br_4CuN_7O_7$  ( $M_r = 903.67$ ), *calc.*: C, 31.90; H, 2.45; N, 10.84. Found: C, 31.82; H, 2.56; N, 10.93. IR data for **5** (KBr,  $cm^{-1}$ , Fig. S13): 3444 s, 3288 m, 3052 s, 1578 s, 1527 s, 1482 m, 1423 m, 1314 m, 1257 m, 1183 m, 1147 s, 1104 s, 974 w, 931 s, 875 m, 776 m, 646 m, 521 w.

#### 4.3.6 Syntheses of $[Co(L^2H)_2]_2 \cdot (H_2O)_{0.5}$ (**6**)

A mixture of  $Co(NO_3)_2 \cdot 6H_2O$  (0.5 mmol, 0.145 g),  $L^2H_2$  (0.5 mmol, 0.141 g), ethanol (5 mL) and DMF (5 mL) with a pH adjusted to 6 by the addition of trimethylamine was stirred for 5 min at room temperature. The mixture was poured into a Teflon-lined autoclave (20 mL) and then heated at 80 °C for 72 h. Red block crystals of **6** were collected by filtration, washed with ethanol (10 mL  $\times$  3) and dried in air (yield: 138.82 mg, *ca.* 44.38 % based on  $L^2H_2$ ). *Anal. Calc.* for **6**:  $C_{48}H_{33}Cl_8Co_2N_{12}O_{4.5}$  ( $M_r = 1251.32$ ), *calc.*: C, 46.07; H, 2.66; N, 13.43. Found: C, 45.98; H, 2.75; N, 13.49. IR data for **6** (KBr,  $cm^{-1}$ , Fig. S10): 3460 w, 1674 s, 1617 s, 1528 m, 1461 m, 1388 m, 1346 s, 1289 m, 1170 m, 1135 s, 991 s, 814 w, 774 w, 724 w, 686 m, 449 w.

#### 4.3.7 Syntheses of $[Co(L^3H)_2]_2 \cdot (H_2O)_{0.5}$ (**7**)

Complex **7** was obtained by the similar route to **6**, except that  $L^2H_2$  was replaced by  $L^3H_2$ . Red crystals of **7** were obtained (yield: 151.26 mg, *ca.* 42.34 % based on  $L^3H_2$ ). *Anal. Calc.* for **7**:  $C_{48}H_{33}Br_4Cl_4Co_2N_{12}O_{4.5}$  ( $M_r = 1429.12$ ), *calc.*: C, 40.34; H, 2.33; N, 11.76. Found: C, 40.26; H, 2.41; N, 11.84. IR data for **7** (KBr,  $cm^{-1}$ , Fig. S11): 3460 w, 1674 s, 1617 m, 1528 s, 1461 m, 1388 s, 1321 s, 1289 s, 1248 s, 1170 s, 1135 s, 991 m, 814 m, 774 w, 724 w, 686 w, 449 w.

#### 4.3.8 Syntheses of $[Co(L^4H)_2]_2 \cdot (H_2O)_{0.5}$ (**8**)

Complex **8** was obtained by the similar route to **6**, except that  $L^2H_2$  was replaced by  $L^4H_2$ . Red crystals of **8** were obtained (yield: 153.59 mg, *ca.* 42.99 % based on  $L^4H_2$ ). *Anal. Calc.* for **8**:  $C_{48}H_{33}Br_4Cl_4Co_2N_{12}O_{4.5}$  ( $M_r = 1429.12$ ), *calc.*: C, 40.34; H, 2.33; N, 11.76. Found: C, 40.29; H, 2.39; N, 11.75. IR data for **8** (KBr,  $cm^{-1}$ , Fig. S12): 3420 s, 2928 s, 1657 s, 1617 m, 1581 m, 1534 w, 1461 m, 1417 m, 1388 m, 1303 m, 1255 m, 1215 m, 1170 m, 1147 m, 998 m, 777 m, 724 m, 453 w.

#### 4.3.8 Syntheses of $[Co(L^5H)_2]_2 \cdot (H_2O)_{0.5}$ (**9**)

Complex **9** was obtained by the similar route to **6**, except that  $L^2H_2$  was replaced by  $L^5H_2$ . Red crystals of **9** were obtained (yield: 164.53 mg, *ca.* 40.95 % based on  $L^5H_2$ ). *Anal. Calc.* for **9**:  $C_{48}H_{33}Br_8Co_2N_{12}O_{4.5}$  ( $M_r = 1607.01$ ), *calc.*: C, 35.88; H, 2.07; N, 10.45. Found: C, 35.81; H, 2.12; N, 10.54. IR data for **9** (KBr,  $cm^{-1}$ , Fig. S13): 3420 s, 2928 s, 1657 s, 1617 s, 1581 w, 1534 w, 1461 w, 1417 w, 1388 w, 1303 s, 1255 s, 1215 m, 1170 w, 1147 w, 998 m, 777 m, 724 w, 453 w.

#### 4.3.10 Syntheses of $[Cu(L^6)_{0.5}(L^{10}H)_{0.5}(phen)] \cdot (CH_3OH)_{0.25}$ (**10**)

A mixture of  $Cu(NO_3)_2 \cdot 3H_2O$  (0.5 mmol, 0.121 g),  $H_2L^6$  (0.5 mmol, 0.1638 g), [1,10]phenanthroline (phen, 0.5 mmol, 0.0901 g), methanol (4 mL) and deionized water (6 mL) with a pH adjusted to 6 by the addition of trimethylamine was stirred for 10 min at room temperature. The mixture was poured into a Teflon-lined autoclave (20 mL) and then heated at 80 °C for 72 h. Blue block crystals of **10** were collected by filtration, washed with deionized water (10 mL  $\times$  3) and dried in air (yield: 164 mg, *ca.* 58.46 % based on Cu). *Anal. Calc.* for **10**:  $C_{23.25}H_{15.5}BrCl_{0.5}CuN_6O_{1.25}$  ( $M_r = 560.09$ ), *calc.*: C, 49.85; H, 2.79; N, 15.00. Found: C, 49.65; H, 2.88; N, 15.02. IR data for **10** (KBr,  $cm^{-1}$ , Fig. S14): 3157 w, 2899 w, 1587 m, 1477 w, 1391 m, 1267 w, 1186 w, 1133 s, 983 s, 943 s, 816 m, 646 s, 527 s.

#### 4.3.11 Syntheses of $[Cu(L^{11}H)(phen)]_4 \cdot (H_2O)_9$ (**11**)

Complex **11** was obtained by the similar route to **10**, except that  $L^6H_2$  was replaced by  $L^7H_2$ . The pH of the mixture solvent adjusted to 7.5 by the addition of trimethylamine. Blue crystals

of **11** were obtained (yield: 142.73 mg, *ca.* 51.2 % based on Cu). *Anal. Calc.* for **11**: C<sub>100</sub>H<sub>98</sub>Cu<sub>4</sub>N<sub>24</sub>O<sub>21</sub> (*M<sub>r</sub>* = 2226.22), *calc.*: C, 53.95; H, 4.44; N, 15.10. Found: C, 53.77; H, 4.69; N, 15.17. IR data for **11** (KBr, cm<sup>-1</sup>, Fig. S15): 3281 w, 2963 w, 1586 m, 1480 w, 1402 m, 1264 w, 1208 m, 1126 w, 1065 m, 907 w, 828 w, 773 m, 727 m, 598 s, 522 w.

#### 4.3.12 Syntheses of [Cu(L<sup>8</sup>)<sub>0.27</sub>(L<sup>12</sup>H)<sub>0.73</sub>(phen)]<sub>4</sub>·(H<sub>2</sub>O)<sub>5.5</sub>·(CH<sub>3</sub>OH) (**12**)

Complex **12** was obtained by the similar route to **10**, except that L<sup>6</sup>H<sub>2</sub> was replaced by L<sup>8</sup>H<sub>2</sub>. The pH of the mixture solvent adjusted to 7.0 by the addition of trimethylamine. Blue crystals of **12** were obtained (yield: 152.85 mg, *ca.* 54.10 % based on Cu). *Anal. Calc.* for **12**: C<sub>103.94</sub>H<sub>99.82</sub>Cl<sub>1.06</sub>Cu<sub>4</sub>N<sub>24</sub>O<sub>17.44</sub> (*M<sub>r</sub>* = 2256.00), *calc.*: C, 55.33; H, 4.46; N, 14.89. Found: C, 55.16; H, 4.72; N, 14.92. IR data for **12** (KBr, cm<sup>-1</sup>, Fig. S16): 3179 w, 1597 m, 1514 w, 1514 w, 1435 w, 1312 w, 1216 m, 1152 m, 1109 w, 1066 w, 999 m, 949 m, 839 s, 713 s, 646 m, 603 m, 560 m, 501 w.

#### 4.3.13 Syntheses of [Cu(L<sup>9</sup>H)(phen)]<sub>3</sub>·(H<sub>2</sub>O)<sub>7</sub>·(CH<sub>3</sub>OH) (**13**)

Complex **13** was obtained by the similar route to **10**, except that L<sup>6</sup>H<sub>2</sub> was replaced by L<sup>9</sup>H<sub>2</sub>. Blue crystals of **13** were obtained (yield: 138.58 mg, *ca.* 52.7 % based on Cu). *Anal. Calc.* for **13**: C<sub>70</sub>H<sub>63</sub>Cl<sub>3</sub>Cu<sub>3</sub>N<sub>18</sub>O<sub>11</sub> (*M<sub>r</sub>* = 1629.38), *calc.*: C, 51.60; H, 3.90; N, 15.47. Found: C, 51.68; H, 3.88; N, 15.58. IR data for **13** (KBr, cm<sup>-1</sup>, Fig. S17): 3602 s, 2982 w, 1608 m, 1516 w, 1442 m, 1361 s, 1289 s, 1202 m, 1151 w, 908 w, 838 m, 751 s, 585 m, 546 m.
